1 **Cold tolerance of mountain stoneflies (Plecoptera: Nemouridae) from the high Rocky**  
2 **Mountains**

3  
4 Scott Hotaling<sup>1,\*</sup>, Alisha A. Shah<sup>2,\*</sup>, Michael E. Dillon<sup>3</sup>, J. Joseph Giersch<sup>4</sup>, Lusha M. Tronstad<sup>5</sup>,  
5 Debra S. Finn<sup>6</sup>, H. Arthur Woods<sup>7</sup>, and Joanna L. Kelley<sup>8</sup>

6  
7 **Affiliations:**

8 <sup>1</sup> School of Biological Sciences, Washington State University, Pullman, WA, USA

9 <sup>2</sup> Division of Biological Sciences, University of Montana, Missoula, MT, USA

10 <sup>3</sup> Department of Zoology and Physiology and Program in Ecology, University of Wyoming,  
11 Laramie, WY, USA; [michael.dillon@uwyo.edu](mailto:michael.dillon@uwyo.edu)

12 <sup>4</sup> U.S. Geological Survey, Northern Rocky Mountain Science Center, West Glacier, MT, USA;  
13 [jgiersch@usgs.gov](mailto:jgiersch@usgs.gov)

14 <sup>5</sup> Wyoming Natural Diversity Database, University of Wyoming, Laramie, WY, USA;  
15 [tronstad@uwyo.edu](mailto:tronstad@uwyo.edu)

16 <sup>6</sup> Department of Biology, Missouri State University, Springfield, MO, USA;  
17 [DFinn@MissouriState.edu](mailto:DFinn@MissouriState.edu)

18 <sup>7</sup> Division of Biological Sciences, University of Montana, Missoula, MT, USA;  
19 [art.woods@umontana.edu](mailto:art.woods@umontana.edu)

20 <sup>8</sup> School of Biological Sciences, Washington State University, Pullman, WA, USA;  
21 [joanna.l.kelley@wsu.edu](mailto:joanna.l.kelley@wsu.edu)

22 \* Contributed equally

23  
24 **Correspondence:**

25 Scott Hotaling, School of Biological Sciences, Washington State University, Pullman, WA,  
26 99164; Email: [scott.hotaling@wsu.edu](mailto:scott.hotaling@wsu.edu); Phone: (828) 507-9950; ORCID: 0000-0002-5965-0986

27  
28 Alisha A. Shah, Division of Biological Sciences, University of Montana, Missoula, MT, 59812,  
29 USA, Email: [alisha.shah@mso.umt.edu](mailto:alisha.shah@mso.umt.edu); Phone: (512) 694-7532; ORCID: 0000-0002-8454-7905

30  
31 **Running head:** Cold tolerance of mountain stoneflies

32  
33 This draft manuscript is distributed solely for purposes of scientific peer review. Its content is deliberative and  
34 predecisional, so it must not be disclosed or released by reviewers. Because the manuscript has not yet been approved for  
35 publication by the U.S. Geological Survey (USGS), it does not represent any official USGS finding or policy.

36

## ABSTRACT

37 How aquatic insects cope with cold temperatures is poorly understood. This is particularly true  
38 for high-elevation species that often experience a seasonal risk of freezing. In the Rocky  
39 Mountains, nemourid stoneflies (Plecoptera: Nemouridae) are a major component of mountain  
40 stream biodiversity and are typically found in streams fed by glaciers and snowfields, which due  
41 to climate change, are rapidly receding. Predicting the effects of climate change on mountain  
42 stoneflies is difficult because their thermal physiology is largely unknown. We investigated cold  
43 tolerance of several alpine stoneflies (*Lednia tumana*, *Lednia tetonica*, and *Zapada* spp.) from  
44 the Rocky Mountains, USA. We measured the supercooling point (SCP) and tolerance to ice  
45 enclosure of late-instar nymphs collected from a range of thermal regimes. SCPs varied among  
46 species and populations, with the lowest SCP measured for nymphs from an alpine pond, which  
47 is much more likely to freeze solid in winter than flowing streams. We also show that *L. tumana*  
48 cannot survive being enclosed in ice, even for short periods of time (less than three hours) at  
49 relatively mild temperatures (-0.5 °C). Our results indicate that high-elevation stoneflies at  
50 greater risk of freezing may have correspondingly lower SCPs, and despite their common  
51 association with glacial meltwater, they appear to be living near their lower thermal limits.

52

## INTRODUCTION

53

54

55

56

57

58

59

60

61

62

Freshwater habitats in cold regions typically experience winter ice cover and freezing temperatures that can be injurious or lethal to aquatic insects (Danks 2008). Resident species may avoid extreme cold by moving to warmer or more thermally stable microclimates or by modifying local conditions (e.g., through case-making; Danks 1971). Others withstand cold conditions *in situ* through supercooling—maintaining internal water in liquid form below its freezing point—or freeze tolerance (Danks 2008, Sinclair et al. 2015, Zachariassen 1985). Organisms living in wet environments are likely to encounter external ice when their body temperatures are already at or near freezing. Thus, inoculative freezing—in which contact with external ice induces the formation of internal ice—is likely the main driver of organismal freezing in these habitats (Frisbie & Lee Jr. 1997).

63

64

65

66

67

68

69

70

71

72

73

74

At high elevations, aquatic habitats are typically distributed across a mosaic of streams and ponds that are fed by an array of hydrological sources (e.g., glaciers, perennial snowfields, subterranean ice; Hotaling et al. 2017) and remain snow-covered for much of the year (Lencioni 2004). Mountain streams appear to not freeze solid because of their steep gradients and year-round flow, with minimum temperatures often close to 0 °C in the main channel (Giersch et al. 2017, Shah et al. 2017, Tronstad et al. in press). Resident taxa are therefore predicted to experience minimum temperatures of ~0 °C. This prediction rests on the assumption that overwintering nymphs remain in the unfrozen primary stream channel throughout the winter season. However, because of the inherent variation in aquatic habitats, nymphs inhabiting different regions of a stream (e.g., littoral zone, bed sediments) may experience subfreezing temperatures, even when the rest of the stream remains unfrozen (Lencioni 2004). Alpine ponds, in contrast, have little or no flow and are often shallow, making them susceptible to freezing

75 solid (Wissinger et al. 2016). As melt-induced flows are reduced in the future under climate  
76 change (Huss & Hock 2018), headwater streams will become shallower with less flow velocity,  
77 raising the risk of freezing in all seasons for resident organisms.

78 Stoneflies (Order Plecoptera) inhabit every continent except Antarctica and, when  
79 present, often represent a substantial portion of aquatic biodiversity (DeWalt et al. 2015). After  
80 hatching, stoneflies follow a two-stage life cycle with development through multiple instars as  
81 aquatic, larval nymphs followed by emergence as winged, terrestrial adults. Whether  
82 development occurs in a single year or spans multiple seasons, eggs and larvae of high-elevation  
83 stoneflies are exposed to near freezing temperatures. Cold tolerance of stoneflies and of aquatic  
84 insects broadly is poorly known, particularly for non-adult life stages (i.e., eggs or nymphs;  
85 Danks 2008) and species living at high latitudes and elevations—where taxa are most likely to  
86 experience freezing. Aquatic insects generally employ an array of physiological and biochemical  
87 strategies to mitigate cold stress (reviewed by Lencioni et al. 2004). These include the production  
88 of cryoprotectants to lower the temperature of internal ice formation (Duman et al. 2015),  
89 cryoprotective dehydration where body water is lost to lower the amount available for freezing  
90 (e.g., Gehrken & Sømme 1987), and the ability to resist anoxic conditions induced by ice  
91 enclosure (e.g., Brittain & Nagell 1981). Eggs of the stonefly *Arcynopteryx compacta*  
92 (Perlodidae) from the mountains of southern Norway avoid freezing by supercooling to -31 °C, a  
93 trait mediated by the loss of approximately two-thirds of the eggs' water content (Gehrken 1989,  
94 Gehrken & Sømme 1987). Nymphs of another high-latitude stonefly, *Nemoura arctica*  
95 (Nemouridae), survive freezing to well below 0 °C by preventing intracellular ice formation  
96 through the production of a xylomannan-based glycolipid, which inhibits inoculative freezing  
97 through the inactivation of ice nucleating agents (Walters et al. 2009, 2011). However, it is

98 unlikely that glycolipid production represents a singular ‘magic bullet’ that confers freeze  
99 tolerance in stoneflies, or aquatic insects broadly, given the diversity of known freeze protecting  
100 molecules (Toxopeus & Sinclair 2018). Like *N. arctica*, high-alpine nemourids in North America  
101 appear to overwinter as early-instar nymphs (Figure S1) and may be exposed to a similar risk of  
102 freezing. How they cope with such risks, however, has not been investigated.

103         In this study, we investigated cold tolerance across populations of late-instar nymphs  
104 from at least three species [*Lednia tumana* (Ricker 1952), *Lednia tetonica* Baumann & Call  
105 2010, and *Zapada* spp.; Nemouridae)] in the northern Rocky Mountains, USA. For all  
106 populations, we measured the dry supercooling point (SCP)—the temperature at which an  
107 organism releases latent heat indicative of ice formation (Sinclair et al. 2015)—in the absence of  
108 ice. Enclosure in ice may also be a major risk for mountain stoneflies, especially in slower  
109 flowing shallow streams. Ice-enclosure can cause mortality through inoculative freezing,  
110 hypoxia, mechanical damage, or a combination of factors (Conradi-Larsen & Sømme 1973). One  
111 nemourid, *N. arctica*, can survive ice enclosure (Walters et al. 2009), but how widespread this  
112 ability is among stoneflies is unknown. Thus, for one population from Lunch Creek, we also  
113 tested whether nymphs could survive ice enclosure. Given the perennial and fast-flowing  
114 conditions of alpine streams, we expected winter conditions to be largely constant with  
115 temperatures near 0 °C and likelihood of freezing to generally be low. Therefore, we did not  
116 expect stonefly SCPs to vary among stream-inhabiting populations. Conversely, because high  
117 elevation pond-dwelling stoneflies likely experience a greater risk of freezing, we expected  
118 resident nymphs to exhibit lower SCPs. Furthermore, given that *N. arctica* nymphs can survive  
119 being enclosed in ice and that streams containing *Lednia* are commonly near 0 °C even in  
120 summer (Figure S2), we expected *L. tumana* nymphs to survive ice enclosure. Our study

121 represents a preliminary step toward understanding how alpine stonefly cold tolerance varies at  
122 broad taxonomic and environmental scales—i.e., across species, populations, and habitats—  
123 setting the stage for future, more targeted studies of the group.

124

## 125 **MATERIALS AND METHODS**

### 126 **Sampling and environmental data collection**

127 For SCP measurements, we collected late-instar stonefly nymphs from six populations in  
128 the Rocky Mountains between 29 July – 6 August 2018 (Figure 1; Tables 1, S1). To test whether  
129 high-elevation nemourids could survive being enclosed in ice, we collected additional late-instar  
130 *L. tumana* nymphs from Lunch Creek in Glacier National Park, MT, on 17 August 2019.

131 Nymphs were transferred in 1 L Whirl-Pak bags (Nasco) filled with streamwater from the  
132 backcountry to the laboratory in ice-filled coolers. Transport duration depended on distance from  
133 a trailhead, ranging from a few hours (Lunch Creek) to more than 24 hours (Mount Saint John).  
134 Populations were sampled from two Rocky Mountain sub-ranges centered around Glacier and  
135 Grand Teton National Parks (Figure 1). Due to the remote, rugged terrain and high seasonal  
136 snowfall in the Rocky Mountains, we targeted our specimen collections to occur in late summer,  
137 soon after most streams in our study area became free of seasonal snow. We identified specimens  
138 based on morphology and collection localities following previous studies (e.g., Giersch et al.  
139 2017). Unlike *Lednia*, multiple *Zapada* species can be present in the same stream, and therefore,  
140 we cannot exclude the presence of more than one species in the Wind Cave population (Table 1).

141 We collected environmental data at each site to characterize the temperatures nymphs  
142 experience in the wild and to categorize sites by habitat type (e.g., glacier-fed, snowmelt-fed,  
143 groundwater-fed, or a high-elevation pond; see below). We recorded temperature hourly with

144 HOBO loggers (Onset Computer Corporation) placed within ~5 cm of the main channel  
145 streambed. Lengths of logger deployments ranged from less than 24 hours (Mount Saint John,  
146 Tetonica Pond) to a full calendar year (Lunch Creek, Skillet Glacier, Wind Cave). Using these  
147 data, we constructed 24-hour thermographs for each site on a representative day in late July. Our  
148 focal 24-hour period was 31 July 2019 for all sites except Lunch Creek (31 July 2014) and Wind  
149 Cave (28 July 2019). For the focal period, we measured the lowest ( $T_{\text{MIN}}$ ) and mean ( $T_{\text{MEAN}}$ )  
150 temperatures. We also measured specific conductivity (C) with a YSI Professional ProPlus  
151 multiparameter probe, which was calibrated at the trailhead before each trip. Specific  
152 conductivity reflects ionic concentration in the water and is elevated in water that interacts with  
153 inorganic debris (e.g., streams fed by debris-covered rock glaciers). We assessed stream channel  
154 stability via a modified version of the Pfankuch Index (PI, Peckarsky et al. 2014). We estimated  
155 when sites became ice-free in 2018 using satellite imagery (Copernicus Sentinel 2).

156 We classified sites into one of four habitat types based on a combination of primary  
157 hydrological source, environmental variation, geomorphology, and field surveys. Habitat types  
158 included: streams fed by a surface glacier (e.g., “glacier-fed”), streams fed by a perennial  
159 snowfield (“snowmelt-fed”), streams emanating from subterranean ice (e.g., rock glaciers, “icy  
160 seep”; Hotaling et al. 2019, Tronstad et al. in press), and slow-flowing, alpine ponds (“pond”),  
161 identified by their low-angle profile and appearance of standing water. To discern among the  
162 three stream types, we relied on geographic data paired with the environmental signature of  
163 primary hydrological sources—glaciers, snowfields, or subterranean ice masses. Glacier-fed  
164 streams were identified by four criteria: named glaciers feeding them, low minimum  
165 temperatures ( $T_{\text{MIN}} < 3\text{ }^{\circ}\text{C}$ ), low C ( $< 10\text{ }\mu\text{S cm}^{-1}$ ), and high PI ( $> 25$ , indicating more unstable  
166 stream channels). Streams were classified as snowmelt-fed if a permanent snowfield was visibly

167 feeding them, they exhibited higher minimum temperatures ( $T_{\text{MIN}} > 3 \text{ }^{\circ}\text{C}$ ), moderate C (10-50  $\mu\text{S}$   
168  $\text{cm}^{-1}$ ), and a moderately stable stream channel ( $\text{PI} = 18\text{-}25$ ). We categorized streams as icy seeps  
169 if they were consistently low (e.g.,  $T_{\text{MEAN}} \leq 3 \text{ }^{\circ}\text{C}$ ) yet had no named glaciers or significant  
170 perennial snowfields feeding them, a classic “lobe” of a rock glacier was visible (e.g., Mount  
171 Saint John), and they exhibited moderate to high C for mountain streams ( $> 25 \mu\text{S cm}^{-1}$ ).

172

### 173 Measuring supercooling points

174 In the laboratory, nymphs were held at  $3 \text{ }^{\circ}\text{C}$  with no access to food for 12-72 hours  
175 (Table S1). For each SCP measurement, we blotted nymphs with Kimwipes (Kimberly Clark)  
176 and placed them in dry 1.5 mL microcentrifuge tubes. A 30-gauge T-type thermocouple (2 mm  
177 soldered tip) was held in contact with each nymph’s abdomen by a piece of cotton wedged into  
178 the tube. Thermocouples were attached to 4-channel loggers (UX-120,  $\pm 0.6 \text{ }^{\circ}\text{C}$  accuracy, Onset  
179 Corporation). Up to 12 microcentrifuge tubes were placed in an aluminum block in contact with  
180 a thermoelectric cooler, attached to a heat sink immersed in a glycol bath on the opposite face.  
181 We used a custom temperature controller to decrease the temperature at  $\sim 0.5\text{-}1 \text{ }^{\circ}\text{C}$  per minute.  
182 We estimated the SCP as the lowest recorded temperature before observing the transient increase  
183 in temperature as the body released latent heat and started to freeze. After SCPs were recorded  
184 for all nymphs in a given experimental group, we promptly removed them from the experimental  
185 bath. Nymphs were clearly dead upon removal from the microcentrifuge tubes after the SCP  
186 tests, with no movement for several minutes and no response to probing. We subsequently  
187 measured body length to the nearest millimeter for all specimens with a microscope and ocular  
188 scale.

189



190 Testing tolerance to ice enclosure

191 We assessed whether late-instar *L. tumana* nymphs could survive being enclosed in ice, a  
192 potential environmental risk factor in high-elevation streams and ponds. After collection,  
193 nymphs were maintained at 5 °C in the laboratory for 72 hours with no access to food. We then  
194 placed a single nymph in each well of an ice-cube tray with approximately 22 mL of  
195 streamwater. Nymphs were assigned to one of three treatments: -0.5 °C (freezing,  $N = 8$ ), 0.1 °C  
196 (near freezing,  $N = 13$ ), or control (5 °C,  $N = 6$ ). Thermocouples were inserted into the wells to  
197 monitor temperature. Once the streamwater reached the desired temperature, we began the  
198 treatment which lasted for three hours. Following the experiment, we placed nymphs at 5 °C to  
199 recover for seven hours. After the recovery period, we assessed survival by observation and  
200 gentle prodding.

201

202 Statistical analyses

203 We performed all analyses in R (R Core Team 2017). We first conducted an ANOVA to  
204 assess the effects of body length on SCP across all species. Next, to test if there were differences  
205 in SCP across populations, we conducted an ANOVA using population as the predictor variable  
206 and SCP as the response variable. A Tukey HSD correction for multiple comparisons was used  
207 to compare the mean SCP for each pair of streams. We used the same approach (ANOVA with  
208 Tukey HSD correction) to estimate the effect of habitat type (glacier-fed, snowmelt-fed, icy seep,  
209 or pond) or species (*L. tumana*, *L. tetonica*, or *Zapada* spp.) on SCP. Finally, we tested for  
210 population-specific variation in SCP for *L. tetonica*. We included body length as a covariate in  
211 all models to account for body size effects.

212

213

## RESULTS

214

### Environmental variation and habitat types

215

216

217

218

219

220

221

222

223

224

225

226

227

### Supercooling points

228

229

230

231

232

233

234

235

The sites sampled in this study represented four habitat types (Table 1). Tetonica Pond was the only site that lacked steep, flowing water, and thus was the only ‘pond’ we included. We also sampled two glacier-fed streams (Cloudveil Dome, Skillet Glacier outlet), two icy seeps (Wind Cave, Mount Saint John), and one snowmelt-fed stream (Lunch Creek). Over the focal 24-hour period, minimum temperature was lowest at Cloudveil Dome ( $T_{\text{MIN}} = 1.8 \text{ }^{\circ}\text{C}$ ) and highest at Lunch Creek ( $T_{\text{MIN}} = 4.2 \text{ }^{\circ}\text{C}$ ; Table 1). Mean temperature followed the same pattern with Cloudveil Dome the coldest ( $T_{\text{MEAN}} = 2.0 \text{ }^{\circ}\text{C}$ ) and Lunch Creek the warmest ( $T_{\text{MEAN}} = 6.2 \text{ }^{\circ}\text{C}$ ; Table 1). For all sites except Wind Cave, seasonal snow cover persisted well into July (Table S1). For Lunch Creek, Wind Cave, and Skillet Glacier, full-year thermographs indicate that the main stream channel remains unfrozen year-round (Figure S2), but whether this lack of freezing extends to the streambed and margins is unknown.

Across all species, populations, and habitats, the mean SCP was  $-6.5 \pm 1.7 \text{ }^{\circ}\text{C}$  (Table 1). Larger nymphs had higher SCPs than smaller nymphs ( $F_{(1,101)} = 7.14$ ,  $P = 0.009$ ; Figure S3); we therefore included body length as a covariate in our statistical models. We found significant differences in SCPs among species ( $F_{(2,109)} = 3.25$ ,  $P = 0.043$ ; Figure 2A), populations ( $F_{(7,95)} = 4.528$ ,  $P$ , ANOVA  $< 0.001$ ), and habitats ( $F_{(4,98)} = 4.556$ ,  $P = 0.002$ ). Within a single species, *L. tetonica*, the SCP varied significantly among habitats ( $F_{(3,62)} = 10.4$ ,  $P < 0.001$ ; Figure 2B). Individuals from Tetonica Pond had the lowest mean SCP overall ( $-7.5 \pm 1.3^{\circ}\text{C}$ , Table 1) and those from glacier-fed streams had the highest (Table 1).

236

237

#### Tolerance to ice enclosure

238

239

240

241

242

243

244

### DISCUSSION

245

246

247

248

249

250

251

252

253

254

255

256

257

258

No *L. tumana* nymphs ( $N = 0$  of 8) in the freezing treatment ( $-0.5$  °C) survived being entirely enclosed in ice. In the near-freezing treatment ( $0.1$  °C), ~84% of nymphs ( $N = 7$  of 8) survived. A thin layer of ice formed on the surface of the well during the treatment but the remainder of the streamwater beneath it containing each nymph did not freeze. All nymphs survived the  $5$  °C control treatment ( $N = 6$  of 6).

Stoneflies are a major component of aquatic biodiversity in mountain ecosystems yet little is known of their ability to cope with low temperatures, particularly as it relates to potential freezing stress. In this study, we measured supercooling points (SCPs) and tolerance to ice enclosure for high-elevation stonefly nymphs in the Rocky Mountains to link their physiological traits to the thermal regimes they experience. Our SCP estimates aligned with those described for other aquatic insects ( $-3.3^{\circ}$  to  $-7.4$  °C; Moore & Lee Jr 1991) and varied by species, population, and habitat. Because SCPs are typically higher for aquatic insects in summer versus winter, the values observed in our study likely reflect maximum dry SCPs for our focal species (Moore & Lee Jr 1991). Within *L. tetonica*, the alpine pond population exhibited lower SCPs than those from icy seeps (and the lowest mean SCP of any population,  $-7.5 \pm 1.3$  °C), which in turn had lower SCPs than those from glacier-fed streams. Based on our results, we cannot disentangle the mechanism driving these patterns of cold tolerance (i.e. plasticity or local adaptation), but a correlation between thermal regime and SCP appears to exist. Although hydrologically connected to steep, fast-flowing streams, the small size, shallowness, and extremely slow flow of

259 Tetonica Pond likely elevates winter freezing risk for resident taxa; alpine ponds in the Rocky  
260 Mountains often freeze solid in winter (Wissinger et al. 2016). Snow cover persisted on Tetonica  
261 Pond until mid-July in 2018 (Table S1), suggesting it also may have been frozen late into the  
262 summer. An alternative explanation for the variation in SCPs we observed across habitats is the  
263 potential for differences in gut contents given the range of holding periods (12-72 hours, Table  
264 S1). Because gut contents can include efficient ice nucleating agents (and raise SCPs; Danks,  
265 2008), we would expect higher SCPs for populations that were held for the shortest amount of  
266 time if this was confounding our results. However, Tetonica Pond had one of the shortest holding  
267 periods (12 hours) yet the lowest SCP (Tables 1, S1).

268         Because we tested SCPs in the absence of ice, it is likely that the inoculative freezing  
269 temperatures of our focal species are much higher than the values we report. For example, when  
270 in contact with ice, the SCP of *N. arctica* is -1.5 °C, but in its absence, *N. arctica* supercools to -  
271 7.8 °C (Walters et al. 2009), a value that aligns with the range we observed (-7.5 to -5.2 °C;  
272 Table 1). Our ice enclosure experiment results also support the potential for higher inoculative  
273 freezing temperatures for *L. tumana* nymphs in contact with ice. Indeed, nymphs collected in late  
274 August did not survive being enclosed in ice, even at temperatures just below freezing (-0.5 °C).  
275 It is unclear, however, if the nymphs did not survive due to inoculative freezing or something  
276 else (e.g., internal mechanical damage or hypoxia). Nevertheless, a similar result was found for  
277 *N. arctica*. In mid-August, less than 20% of *N. arctica* nymphs survived a two-hour exposure to -  
278 1.5°C. Yet, by late September when stream temperatures are colder and closer to 0°C, more than  
279 80% survived a 7-day exposure to -6.2 °C, suggesting the presence of plasticity in cold tolerance  
280 (Walters et al. 2009). Although testing for seasonal plasticity in freeze tolerance was beyond the  
281 scope of our study, when typical summer conditions prevail (e.g.,  $T_{\text{MEAN}} > 5^{\circ}\text{C}$ ), *L. tumana*

282 nymphs from Lunch Creek are intolerant of even mild subzero temperatures. But unlike the  
283 Chandalar River in Alaska, where *N. arctica* resides and temperatures reach -10 °C at the  
284 sediment-water interface in winter, streams in the high Rocky Mountains appear to rarely, if  
285 ever, fall below 0 °C. Indeed, for the streams in this study for which we have full year  
286 thermographs (Figure S2), only Lunch Creek approached 0 °C at any point during the year. This  
287 thermal buffering likely reflects high levels of insulating snow in the region. However, our  
288 reported temperatures reflect the thermal conditions of the main stream channel. At stream  
289 margins, where flows are slower and less water is available for thermal buffering, temperatures  
290 may be quite different.

291         In this study, we showed that SCPs vary among species, populations, and habitat types  
292 for stonefly nymphs inhabiting Rocky Mountain headwaters. The population most likely to  
293 experience winter freezing stress also exhibited the lowest SCP, suggesting a potential ecological  
294 role for SCP in freeze avoidance among alpine stoneflies. Our results, of course, apply only to  
295 nymphs, one of three life stages in stoneflies: eggs, nymphs (i.e., larvae), and adults. We focused  
296 on nymphs because this stage is the key period when most growth occurs. High-elevation  
297 nemourid stoneflies appear to spend at least one winter as larvae (Figure S1), and statistical  
298 models indicate that species' vulnerability to climate change can be greatly underestimated when  
299 the larval period is overlooked (Levy et al. 2015). With evidence across stonefly species for  
300 cryoprotective dehydration greatly lowering the freezing point of eggs (Gehrken & Sømme  
301 1987), the ability for nymphs to survive being enclosed in ice (Walters et al. 2009), and adults  
302 that emerge in winter (e.g., Bouchard Jr. et al. 2009), it is clear that stoneflies can survive  
303 freezing conditions across all life stages. However, the degree to which freeze tolerance is

304 common or rare, and how cold tolerance varies across life stages within species are key questions  
305 for future study.

306 As climate change proceeds, glaciers and perennial snowfields are receding, driving  
307 reduced mountain streamflow (Hotaling et al. 2017) and habitat reductions for high-elevation  
308 aquatic invertebrates (Domisch et al. 2011, Muhlfeld et al. 2020). Loss of meltwater, higher  
309 ambient temperatures, and rapid contemporary stream warming (e.g., Niedrist & Füreder 2020)  
310 are raising the risks for headwater biodiversity, including many stoneflies that are considered  
311 cold-water stenotherms (de Figueroa et al. 2010, Domisch et al. 2011, but see Hotaling et al.  
312 2020). Reduced streamflow will lower the thermal buffering capacity of streamwater (Shah et al.  
313 2020) and, despite warmer winter temperatures, it will also increase the potential for freezing  
314 stress (Williams et al. 2015). This effect will likely be compounded by decreasing levels of  
315 insulating snowpack as more winter precipitation falls as rain instead of snow (e.g., Huntington  
316 et al. 2004). Specifically, if snowpack accumulates later or melts off earlier, freezing risk in  
317 transitional periods between seasons (e.g., November and June in the Northern Hemisphere) may  
318 increase. Thus, a greater risk of freezing may represent an overlooked climate change threat to  
319 alpine aquatic biodiversity. Although only two stoneflies are known to actively mitigate freezing  
320 stress during non-adult stages (Gehrken 1989, Walters et al. 2009), it is unclear if this reflects  
321 general stonefly biology or a lack of investigation.

322

323

## ACKNOWLEDGEMENTS

324 We acknowledge long-term funding from the University of Wyoming-National Park Service  
325 Research Station (<http://uwnps.org>). S.H. and J.L.K were supported by NSF awards OPP-  
326 1906015 and IOS-1557795. A.A.S. was supported by an NSF Postdoctoral Research Fellowship

327 in Biology (DBI-1807694). M.E.D. was supported by NSF awards DEB-1457659, OIA-  
328 1826834, and EF-1921562. H.A.W. was supported by a grant from the Montana Water Center.  
329 We thank Taylor Price and Lydia Zeglin for field support. Jordan Boersma, Georg Niedrist, and  
330 Brent Sinclair provided valuable comments on the manuscript.

331

332

### LITERATURE CITED

- 333 Bouchard Jr., R.W., B. E. Schuetz, L. C. Ferrington Jr. & S. A. Kells. 2009. Cold hardiness in  
334 the adults of two winter stonefly species: *Allocapnia granulata* (Claassen, 1924) and *A.*  
335 *pygmaea* (Burmeister, 1839) (Plecoptera: Capniidae). *Aquatic Insects* 31:145-155.
- 336 Brittain, J. E. & B. Nagell. 1981. Overwintering at low oxygen concentrations in the mayfly  
337 *Leptophlebia vespertina*. *Oikos* 36:45-50.
- 338 Conradi-Larsen E. & L. Sømme. 1973. Anaerobiosis in the overwintering beetle *Pelophila*  
339 *borealis*. *Nature* 245:388-390.
- 340 Danks, H. 1971. Overwintering of some north temperate and Arctic Chironomidae: II.  
341 Chironomid biology. *The Canadian Entomologist* 103:1875-1910.
- 342 Danks, H. V. 2008. Aquatic insect adaptations to winter cold and ice. *Aquatic insects: challenges*  
343 *to populations*. 1-19.
- 344 de Figueroa, J.M.T., M. J. López-Rodríguez, A. Lorenz, W. Graf, A. Schmidt-Kloiber & D.  
345 Hering. 2010. Vulnerable taxa of European Plecoptera (Insecta) in the context of climate  
346 change. *Biodiversity and Conservation* 19:1269-1277.
- 347 DeWalt, R. E., B. C. Kondratieff & J. B. Sandberg. 2015. Order Plecoptera. Thorp and Covich's  
348 *Freshwater Invertebrates* (Fourth Edition). Elsevier. 933-949.

- 349 Domisch, S., S. C. Jähnig & P. Haase. 2011. Climate-change winners and losers: stream  
350 macroinvertebrates of a submontane region in Central Europe. *Freshwater Biology*  
351 56:2009-2020.
- 352 Duman, J. G. 2015. Animal ice-bind (antifreeze proteins) and glycolipids: an overview with  
353 emphasis on physiological function. *Journal of Experimental Biology* 218:1846-1855.
- 354 Frisbie, M. P. & R.E. Lee Jr. 1997. Inoculative freezing and the problem of winter survival for  
355 freshwater macroinvertebrates. *Journal of the North American Benthological Society*  
356 16:635-650.
- 357 Gehrken, U. 1989. Diapause termination in eggs of the stonefly *Arcynopteryx compacta*  
358 (Mclachland) in relation to dehydration and cold hardiness. *Journal of Insect Physiology*  
359 35:377-385.
- 360 Gehrken, U. & L. Sømme. 1987. Increased cold hardiness in eggs of *Arcynopteryx compacta*  
361 (Plecoptera) by dehydration. *Journal of Insect Physiology* 33:987-991.
- 362 Giersch, J. J., S. Hotaling, R. P. Kovach, L. A. Jones & C. C. Muhlfeld. 2017. Climate-induced  
363 glacier and snow loss imperils alpine stream insects. *Global Change Biology* 23:2577-  
364 2589.
- 365 Hotaling, S., D. S. Finn, J. J. Giersch, D. W. Weisrock & D. Jacobsen. 2017. Climate change and  
366 alpine stream biology: progress, challenges, and opportunities for the future. *Biological*  
367 *Reviews* 92:2024-2045.
- 368 Hotaling, S., M. E. Foley, L. H. Zeglin, D. S. Finn, L. M. Tronstad, J. J. Giersch, C. C. Muhlfeld  
369 & D. W. Weisrock. 2019. Microbial assemblages reflect environmental heterogeneity in  
370 alpine streams. *Global Change Biology* 25:2576-2590.



- 371 Hotaling, S., A. A. Shah, K. L. McGowan, L. M. Tronstad, J. J. Giersch, D. S. Finn, H. A.  
372 Woods, M. E. Dillon & J. L. Kelley. 2020. Mountain stoneflies may tolerate warming  
373 streams: evidence from organismal physiology and gene expression. bioRxiv. DOI:  
374 10.1101/2019.12.16.878926
- 375 Huntington, T.G., G. A. Hodgkins, B. D. Keim & R. W. Dudley. 2004. Changes in the  
376 proportion of precipitation occurring as snow in New England (1949–2000). *Journal of*  
377 *Climate* 17:2626-2636.
- 378 Huss, M. & R. Hock. 2018. Global-scale hydrological response to future glacier mass loss.  
379 *Nature Climate Change* 8:135-140.
- 380 Lencioni, V. 2004. Survival strategies of freshwater insects in cold environments. *Journal of*  
381 *Limnology* 63:45-55.
- 382 Levy, O., L. B. Buckley, T. H. Keitt, C. D. Smith, K. O. Boateng, D. S. Kumar & M. J.  
383 Angilletta Jr. (2015) Resolving the life cycle alters expected impacts of climate change.  
384 *Proceedings of the Royal Society B: Biological Sciences* 282:20150837.
- 385 Moore, M.V. & R. E. Lee Jr. 1991. Surviving the big chill: overwintering strategies of aquatic  
386 and terrestrial insects. *American Entomologist* 37:111-118.
- 387 Muhlfeld, C.C., T. J. Cline, J. J. Giersch, E. Peitzsch, C. Florentine, D. Jacobsen & S. Hotaling.  
388 2020. Specialized meltwater biodiversity persists despite widespread deglaciation.  
389 *Proceeding of the National Academy of Sciences* 117:12208-12214.
- 390 Niedrist, G.H. & L. Füreder. 2020. Real-time warming of alpine streams: re(defining)  
391 invertebrates' temperature preferences. *River Research and Applications* DOI:  
392 10.1002/rra.3638

- 393 Peckarsky, B.L., A. R. McIntosh, S. C. Horn, K. McHugh, D. J. Booker, A. C. Wilcox, W.  
394 Brown & M. Alvarez. 2014. Characterizing disturbance regimes of mountain streams.  
395 *Freshwater Science* 33:716-730.
- 396 R Core Team. 2017. A language and environment for statistical computing.
- 397 Shah, A.A., B. A. Gill, A. C. Encalada, A. S. Flecker, W. C. Funk, J. M. Guayasamin, B. C.  
398 Kondratieff, N. L. Poff, S. A. Thomas & K. R. Zamudio. 2017. Climate variability  
399 predicts thermal limits of aquatic insects across elevation and latitude. *Functional*  
400 *Ecology* 31:2118-2127.
- 401 Shah, A.A., M. E. Dillon, S. Hotaling & H. A. Woods. 2020. High elevation insect communities  
402 face shifting ecological and evolutionary landscapes. *Current Opinion in Insect Science*  
403 41:1-6.
- 404 Sinclair, B.J., L. E. C. Alvarado & L. V. Ferguson. 2015. An invitation to measure insect cold  
405 tolerance: methods, approaches, and workflow. *Journal of Thermal Biology* 53:180-197.
- 406 Toxopeus, J. & B. J. Sinclair. 2018. Mechanisms underlying insect freeze tolerance. *Biological*  
407 *Reviews* 93:1891-1914.
- 408 Tronstad, L.M., S. Hotaling, J. J. Giersch, O. J. Wilmot & D. S. Finn. In press. Headwater  
409 streams fed by subterranean ice: potential climate refugia for mountain communities?  
410 *Western North American Naturalist*.
- 411 Walters, K.R., A. S. Serianni, Y. Voituron, T. Sformo, B. M. Barnes & J. G. Duman. 2011. A  
412 thermal hysteresis-producing xylomannan glycolipid antifreeze associated with cold  
413 tolerance is found in diverse taxa. *Journal of Comparative Physiology B* 181:631-640.
- 414 Walters, K.R., T. Sformo, B. M. Barnes & J. G. Duman. 2009. Freeze tolerance in an arctic  
415 Alaska stonefly. *Journal of Experimental Biology* 212:305-312.

- 416 Williams, C.M., H. A. Henry & B. J. Sinclair. 2015. Cold truths: how winter drives responses of  
417 terrestrial organisms to climate change. *Biological Reviews* 90:214-235.
- 418 Wissinger, S.A., B. Oertli & V. Rosset. 2016. Invertebrate communities of alpine ponds.  
419 Invertebrates in freshwater wetlands. Springer, pp. 55-103.
- 420 Zachariassen, K.E. 1985. Physiology of cold tolerance in insects. *Physiological Reviews* 65:799-  
421 832.

422

## TABLES

423 Table 1. Environmental variation and habitat types included in this study.  $T_{\text{MIN}}$  and  $T_{\text{MEAN}}$ : the  
424 minimum and mean temperatures observed for each site, respectively. C: specific conductivity  
425 ( $\mu\text{S cm}^{-1}$ ); PI: Pfanckuch Index, a measure of stream channel stability (higher values correspond  
426 to a less stable streambed); SCP: mean and standard deviation of the supercooling point. The  
427 focal 24-hour period for temperature measurement was 31 July 2019 for all sites except Lunch  
428 Creek (31 July 2014) and Wind Cave (28 July 2019). All temperatures ( $T_{\text{MIN}}$ ,  $T_{\text{MEAN}}$ , SCP) are in  
429 degrees Celsius. All sites are in Grand Teton National Park except Lunch Creek (Glacier  
430 National Park).

| Population                      | Taxon              | Type        | $T_{\text{MIN}}$ | $T_{\text{MEAN}}$ | C     | PI  | SCP            |
|---------------------------------|--------------------|-------------|------------------|-------------------|-------|-----|----------------|
| Lunch Creek (LC)                | <i>L. tumana</i>   | Snowmelt    | 4.2              | 6.2               | 40.8  | 25  | $-5.9 \pm 2.0$ |
| Wind Cave (WC)                  | <i>Zapada</i> spp. | Icy seep    | 2.6              | 2.8               | 101.1 | 18  | $-7.2 \pm 2.0$ |
| Mt. Saint John (MSJ)            | <i>L. tetonica</i> | Icy seep    | 2.4              | 3.0               | 25.0  | 34  | $-5.8 \pm 0.7$ |
| Cloudveil Dome (CD)             | <i>L. tetonica</i> | Glacier-fed | 1.8              | 2.0               | 4.1   | 32  | $-7.0 \pm 0.9$ |
| Skillet Glacier (SG)            | <i>L. tetonica</i> | Glacier-fed | 2.7              | 4.4               | 3.1   | 34  | $-5.2 \pm 1.1$ |
| Tetonica Pond <sup>a</sup> (TP) | <i>L. tetonica</i> | Pond        | 2.6              | 3.1               | 29.3  | n/a | $-7.5 \pm 1.3$ |

431 <sup>a</sup> Named by the authors. Does not reflect official conventions.

432  
433

## FIGURES

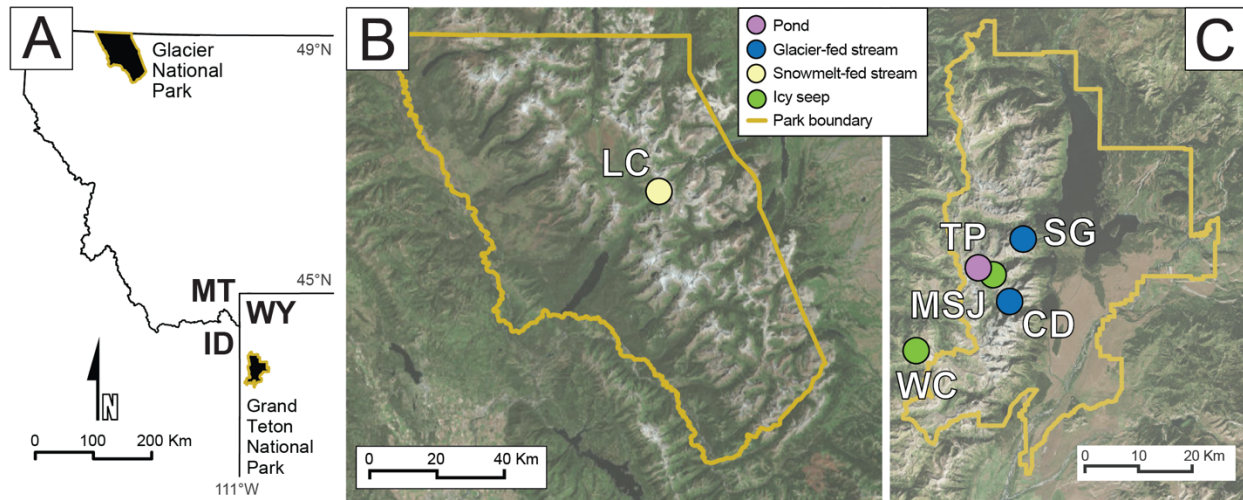

434  
435

436 Figure 1. Populations and habitat types included in this study. A) Locations of the focal ranges in  
437 the Rocky Mountains, B) Glacier National Park, Montana, USA, and C) Grand Teton National  
438 Park and surrounding mountains, Wyoming, USA. See Table 1 for complete population names.

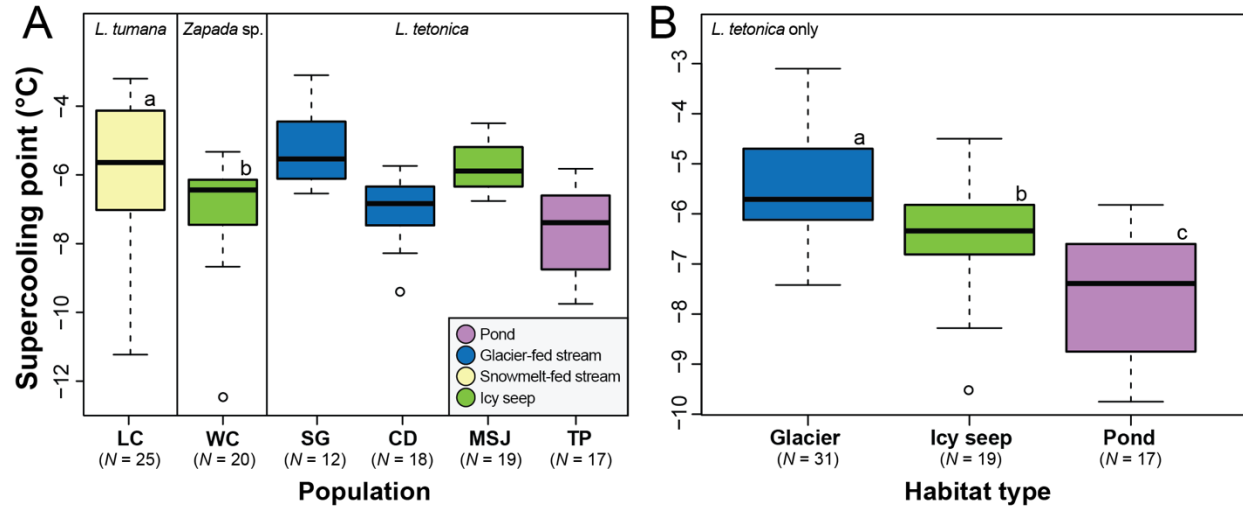

439

440 Figure 2. Box-and-whisker plots of the supercooling point (SCP) for alpine stonefly nymphs in  
441 the Rocky Mountains grouped by (A) species and population and (B) habitat type for *Lednia*  
442 *tetonica* only. In each plot, groups of lower-case letters are significantly different at Tukey's  $P <$   
443 0.05 (see Table S2 for detailed statistics). Dark lines represent median values in the data. Upper  
444 and lower bounds of the box are the upper and lower quartiles, respectively. Outliers are  
445 indicated by open circles. Population acronyms: Lunch Creek (LC), Wind Cave (WC), Skillet  
446 Glacier (SG), Cloudveil Dome (CD), Mount Saint John (MSJ), and Tetonica Pond (TP).
